# Supplementary material for: Changes in Amino Acid and Acylcarnitine Plasma Profiles for Distinguishing Patients with Multiple Sclerosis from Healthy Controls
Source: Hindawi journal article supplement (doi:10.1155/2020/9010937), 2020-07-15
Supplement: f1 [file 9010937.f1.pdf]

**Supplementary Data 1** Data acquisition parameters from Analyst 1.6.2 Software report

**File Information for Sample 221 (MSc-13-L1(1)) of 2018-04-19.wiff**

File Name: 2018-04-19.wiff  
File Path: D:\Analyst Data\Projects\Multiple  
sclerosis\Sclerosis\Data\ Original Name: 2018-04-19.wiff  
Software Version: Analyst 1.6.2

**Log Information from Devices at Start of acquisition:**

|                                     |                                          |        |
|-------------------------------------|------------------------------------------|--------|
| Software Application                | Shimadzu Instrument driver               | 0      |
| Time from start =0.0000 min         | Mass Spectrometer                        | 3200 Q |
| TRAP Config Table Version           | 02                                       |        |
| Firmware Version                    | MIA3000-----MIL3002 MIB3000              |        |
| Component Name                      | Linear Ion Trap Quadrupole LC/MS/MS Mass |        |
| Spectrometer Component ID           | 3200 Q TRAP                              |        |
| Manufacturer                        | AB Sciex Instruments                     |        |
| Model                               | 1031491U                                 |        |
| Serial Number                       | AF26401304                               |        |
| Time from start =0.0000 min         | Mass Spectrometer                        | 3200 Q |
| TRAP Start of Run - Detailed Status |                                          |        |
| Vacuum Status                       | At Pressure                              |        |
| Vacuum Gauge (10e-5 Torr)           | 2.9                                      |        |
| Backing Pump                        | Ok                                       |        |
| Dual Turbo Pump                     | Normal                                   |        |
| Sample Introduction Status          | Ready                                    |        |
| Source/Ion Path Electronics         | On                                       |        |
| Source Type                         | Turbo Spray                              |        |
| Source Temperature (at setpoint)    | 300.0 C                                  |        |
| Source Exhaust Pump                 | Ok                                       |        |
| Interface Heater                    | Ready                                    |        |
| Time from start =0.0000 min         | Shimadzu Instrument                      |        |
| driver Injection Volume             | 14 uL                                    |        |
| System Controller (CBM-20A          |                                          |        |
| Lite) Power On                      | On                                       |        |
| Event 1                             | On                                       |        |
| Event 2                             | Off                                      |        |
| Pumps                               | (LC-20AD/LC-20AD)                        |        |
| Pumping Mode                        | Binary                                   |        |
| Flow Total Flow                     | 0.01                                     |        |
| mL/min                              |                                          |        |
| B Concentration                     | 80 %                                     |        |
| B Curve                             | 0                                        |        |
| P.Min 1                             | 0 MPa                                    |        |
| P.Max 1                             | 20 MPa                                   |        |
| Pump A                              |                                          |        |

## Pump B

### Autosampler (SIL-20AC)

|                     |                             |
|---------------------|-----------------------------|
| Used                | Yes                         |
| Rinsing Volume      | 450 uL                      |
| Needle Stroke       | 52 mm                       |
| Rinsing Speed       | 35 uL/sec                   |
| Sampling Speed      | 15 uL/sec                   |
| Purge Time          | 25 min                      |
| Dip Time            | 0 sec                       |
| Rinse Mode          | Before and after aspiration |
| Cooler Temperature  | 10 C                        |
| Control Vial Stroke | 52 mm                       |

### Time Program

| Time (min) | Module            | Event        | Parameter |
|------------|-------------------|--------------|-----------|
| 0.01       | Pumps             | Pump B Conc. | 80        |
| 0.01       | Pumps             | Total Flow   | 0.1       |
| 0.01       | System Controller | Event        | 0         |
| 0.6        | Pumps             | Total Flow   | 0.1       |
| 0.8        | Pumps             | Total Flow   | 0.07      |
| 1.5        | Pumps             | Total Flow   | 0.07      |
| 1.51       | Pumps             | Total Flow   | 0.4       |
| 1.7        | Pumps             | Total Flow   | 0.4       |
| 1.71       | Pumps             | Total Flow   | 0.1       |
| 1.75       | System Contr      |              |           |
| oller      | Stop              |              |           |

|                                  |             |             |
|----------------------------------|-------------|-------------|
| Mass Spectrometer                | 3200 Q TRAP | 0           |
| End of Run - Detailed Status     |             |             |
| Vacuum Status                    |             | At Pressure |
| Vacuum Gauge (10e-5 Torr)        |             | 2.9         |
| Backing Pump                     |             | Ok          |
| Dual Turbo Pump                  |             | Normal      |
| Sample Introduction Status       |             | Ready       |
| Source/Ion Path Electronics      |             | On          |
| Source Type                      |             | Turbo Spray |
| Source Temperature (at setpoint) |             | 300.0 C     |
| Source Exhaust Pump              |             | Ok          |
| Interface Heater                 |             | Ready       |

Time from start =2.1500 min

### Acquisition Info

|                     |                                                                            |
|---------------------|----------------------------------------------------------------------------|
| Acquisition Method: | \Newborn_amino_acyl_allMRM.dam                                             |
| Acquisition Path:   | D:\Analyst Data\Projects\Multiple sclerosis\Sclerosis\Acquisition Methods\ |



|      |                   |   |            |
|------|-------------------|---|------------|
| 0.01 | Pumps             | 6 | Total Flow |
| 0.01 | System Controller | 0 | Event      |
| 0.6  | Pumps             | 6 | Total Flow |
| 0.8  | Pumps             | 6 | Total Flow |
| 1.5  | Pumps             | 6 | Total Flow |
| 1.51 | Pumps             | 6 | Total Flow |
| 1.7  | Pumps             | 6 | Total Flow |
| 1.71 | Pumps             | 6 | Total Flow |
| 1.75 | System Controller | 3 | Stop       |

Pumps  
 Pumping Mode: Binary Flow  
 P.Min 1: 0 MPa  
 P.Max 1: 20 MPa  
 Total Flow: 0.01 mL/min  
 B Concentration: 80 %  
 B Curve: 0

Pump A

Pump B

Autosampler  
 Used: Yes  
 Rinsing Volume: 450 uL  
 Needle Stroke: 52 mm  
 Rinsing Speed: 35 uL/sec  
 Sampling Speed: 15 uL/sec  
 Purge Time: 25 min  
 Dip Time: 0 sec  
 Rinse Mode: Before and after aspiration  
 Enable Cooler: Yes  
 Cooler Temperature: 10 C  
 Control Vial Stroke: 52 mm

**Quantitation Information:**

Sample Type: Unknown  
 Dilution Factor: 1.000000

Custom Data:

Quantitation Table:

## Period 1:

-----  
Scans in Period: 37  
Relative Start Time: 0.00 msec  
Experiments in Period: 1

## Period 1 Experiment 1:

-----  
Scan Type: MRM (MRM)  
Scheduled MRM: No  
Polarity: Positive  
Scan Mode: N/A  
Ion Source: Turbo Spray  
Resolution Q1: Unit  
Resolution Q3: Unit  
Intensity Thres.: 0.00 cps  
Settling Time: 0.0000 msec  
MR Pause: 5.0070 msec  
MCA: No  
Step Size: 0.00 Da

| Q1 Mass (Da) | Q3 Mass (Da) | Dwell(msec) | Param | Start |
|--------------|--------------|-------------|-------|-------|
| 146.100      | Stop         | ID          |       |       |
|              | 44.000       | 35.00       | DP    | 25.00 |
|              | 25.00        | Alanine     | CEP   | 10.00 |
|              | 10.00        |             | CE    | 22.00 |
|              | 22.00        |             |       |       |

| Q1 Mass (Da) | Q3 Mass (Da) | Dwell(msec) | Param | Start |
|--------------|--------------|-------------|-------|-------|
| 150.100      | Stop         | ID          |       |       |
|              | 48.000       | 35.00       | DP    | 25.00 |
|              | 25.00        | Alanine std | CEP   | 12.00 |
|              | 12.00        |             | CE    | 22.00 |
|              | 22.00        |             |       |       |

| Q1 Mass (Da) | Q3 Mass (Da) | Dwell(msec) | Param | Start |
|--------------|--------------|-------------|-------|-------|
| 231.100      | Stop         | ID          |       |       |
|              | 70.100       | 35.00       | DP    | 48.00 |
|              | 48.00        | Arginine    |       |       |

|              |              |                |       |       |
|--------------|--------------|----------------|-------|-------|
|              |              |                | CEP   | 14.00 |
|              | 14.00        |                | CE    | 41.00 |
|              | 41.00        |                |       |       |
| Q1 Mass (Da) | Q3 Mass (Da) | Dwell(msec)    | Param | Start |
| 238.100      | 77.100       | 35.00          | DP    | 48.00 |
|              | 48.00        | Arginine std   | CEP   | 14.00 |
|              | 14.00        |                | CE    | 41.00 |
|              | 41.00        |                |       |       |
| Q1 Mass (Da) | Q3 Mass (Da) | Dwell(msec)    | Param | Start |
| 246.200      | 144.100      | 35.00          | DP    | 28.00 |
|              | 28.00        | Asparagine     | CEP   | 12.00 |
|              | 12.00        |                | CE    | 26.00 |
|              | 26.00        |                |       |       |
| Q1 Mass (Da) | Q3 Mass (Da) | Dwell(msec)    | Param | Start |
| 249.200      | 147.100      | 35.00          | DP    | 28.00 |
|              | 28.00        | Asparagine std | CEP   | 12.00 |
|              | 12.00        |                | CE    | 26.00 |
|              | 26.00        |                |       |       |
| Q1 Mass (Da) | Q3 Mass (Da) | Dwell(msec)    | Param | Start |
| 218.200      | 85.000       | 35.00          | DP    | 44.00 |
|              | 44.00        | C:0            | CEP   | 12.00 |
|              | 12.00        |                | CE    | 38.00 |
|              | 38.00        |                |       |       |

| Q1 Mass (Da) | Q3 Mass (Da) | Dwell(msec) | Param | Start |
|--------------|--------------|-------------|-------|-------|
| 227.200      | Stop         | ID          |       |       |
|              | 85.000       | 35.00       | DP    | 44.00 |
|              | 44.00        | C:0 std     | CEP   | 12.00 |
|              | 12.00        |             | CE    | 38.00 |
|              | 38.00        |             |       |       |

| Q1 Mass (Da) | Q3 Mass (Da) | Dwell(msec) | Param | Start |
|--------------|--------------|-------------|-------|-------|
| 428.400      | Stop         | ID          |       |       |
|              | 85.000       | 35.00       | DP    | 56.00 |
|              | 56.00        | C:14        | CEP   | 12.00 |
|              | 12.00        |             | CE    | 38.00 |
|              | 38.00        |             |       |       |

| Q1 Mass (Da) | Q3 Mass (Da) | Dwell(msec) | Param | Start |
|--------------|--------------|-------------|-------|-------|
| 431.400      | Stop         | ID          |       |       |
|              | 85.000       | 35.00       | DP    | 56.00 |
|              | 56.00        | C14 std     | CEP   | 12.00 |
|              | 12.00        |             | CE    | 38.00 |
|              | 38.00        |             |       |       |

| Q1 Mass (Da) | Q3 Mass (Da) | Dwell(msec) | Param | Start |
|--------------|--------------|-------------|-------|-------|
| 456.400      | Stop         | ID          |       |       |
|              | 85.000       | 35.00       | DP    | 60.00 |
|              | 60.00        | C16         | CEP   | 12.00 |
|              | 12.00        |             | CE    | 38.00 |
|              | 38.00        |             |       |       |

| Q1 Mass (Da) | Q3 Mass (Da) | Dwell(msec) | Param | Start |
|--------------|--------------|-------------|-------|-------|
|              | Stop         | ID          |       |       |

|         |        |         |     |       |
|---------|--------|---------|-----|-------|
| 459.400 | 85.000 | 35.00   | DP  | 60.00 |
|         | 60.00  | C16 std | CEP | 12.00 |
|         | 12.00  |         | CE  | 38.00 |
|         | 38.00  |         |     |       |

| Q1 Mass (Da) | Q3 Mass (Da) | Dwell(msec) | Param | Start |
|--------------|--------------|-------------|-------|-------|
| 472.400      | 85.000       | 35.00       | DP    | 60.00 |
|              | 60.00        | C16_OH      | CEP   | 12.00 |
|              | 12.00        |             | CE    | 38.00 |
|              | 38.00        |             |       |       |

| Q1 Mass (Da) | Q3 Mass (Da) | Dwell(msec) | Param | Start |
|--------------|--------------|-------------|-------|-------|
| 260.200      | 85.000       | 35.00       | DP    | 36.00 |
|              | 36.00        | C2          | CEP   | 12.00 |
|              | 12.00        |             | CE    | 38.00 |
|              | 38.00        |             |       |       |

| Q1 Mass (Da) | Q3 Mass (Da) | Dwell(msec) | Param | Start |
|--------------|--------------|-------------|-------|-------|
| 263.200      | 85.000       | 35.00       | DP    | 36.00 |
|              | 36.00        | C2 std      | CEP   | 12.00 |
|              | 12.00        |             | CE    | 38.00 |
|              | 38.00        |             |       |       |

| Q1 Mass (Da) | Q3 Mass (Da) | Dwell(msec) | Param | Start |
|--------------|--------------|-------------|-------|-------|
| 274.200      | 85.000       | 35.00       | DP    | 56.00 |
|              | 56.00        | C3          | CEP   | 12.00 |
|              | 12.00        |             |       |       |

|              |              |             |       |       |
|--------------|--------------|-------------|-------|-------|
|              | 38.00        |             | CE    | 38.00 |
| Q1 Mass (Da) | Q3 Mass (Da) | Dwell(msec) | Param | Start |
| 277.200      | 85.000       | 35.00       | DP    | 56.00 |
|              | 56.00        | C3 std      | CEP   | 12.00 |
|              | 12.00        |             | CE    | 38.00 |
|              | 38.00        |             |       |       |
| Q1 Mass (Da) | Q3 Mass (Da) | Dwell(msec) | Param | Start |
| 288.200      | 85.000       | 35.00       | DP    | 28.00 |
|              | 28.00        | C4          | CEP   | 12.00 |
|              | 12.00        |             | CE    | 38.00 |
|              | 38.00        |             |       |       |
| Q1 Mass (Da) | Q3 Mass (Da) | Dwell(msec) | Param | Start |
| 291.200      | 85.000       | 35.00       | DP    | 28.00 |
|              | 28.00        | C4 std      | CEP   | 12.00 |
|              | 12.00        |             | CE    | 38.00 |
|              | 38.00        |             |       |       |
| Q1 Mass (Da) | Q3 Mass (Da) | Dwell(msec) | Param | Start |
| 302.200      | 85.000       | 35.00       | DP    | 44.00 |
|              | 44.00        | C5          | CEP   | 12.00 |
|              | 12.00        |             | CE    | 38.00 |
|              | 38.00        |             |       |       |

| Q1 Mass (Da) | Q3 Mass (Da) | Dwell(msec) | Param | Start |
|--------------|--------------|-------------|-------|-------|
| 311.200      | Stop         | ID          |       |       |
|              | 85.000       | 35.00       | DP    | 44.00 |
|              | 44.00        | C5 std      |       |       |
|              |              |             | CEP   | 12.00 |
|              | 12.00        |             |       |       |
|              | 38.00        |             | CE    | 38.00 |

| Q1 Mass (Da) | Q3 Mass (Da) | Dwell(msec) | Param | Start |
|--------------|--------------|-------------|-------|-------|
| 388.300      | Stop         | ID          |       |       |
|              | 85.000       | 35.00       | DP    | 44.00 |
|              | 44.00        | C5_DC       |       |       |
|              |              |             | CEP   | 12.00 |
|              | 12.00        |             |       |       |
|              | 38.00        |             | CE    | 38.00 |

| Q1 Mass (Da) | Q3 Mass (Da) | Dwell(msec) | Param | Start |
|--------------|--------------|-------------|-------|-------|
| 344.300      | Stop         | ID          |       |       |
|              | 85.000       | 35.00       | DP    | 44.00 |
|              | 44.00        | C8          |       |       |
|              |              |             | CEP   | 12.00 |
|              | 12.00        |             |       |       |
|              | 38.00        |             | CE    | 38.00 |

| Q1 Mass (Da) | Q3 Mass (Da) | Dwell(msec) | Param | Start |
|--------------|--------------|-------------|-------|-------|
| 347.300      | Stop         | ID          |       |       |
|              | 85.000       | 35.00       | DP    | 44.00 |
|              | 44.00        | C8 std      |       |       |
|              |              |             | CEP   | 12.00 |
|              | 12.00        |             |       |       |
|              | 38.00        |             | CE    | 38.00 |

| Q1 Mass (Da) | Q3 Mass (Da) | Dwell(msec) | Param | Start |
|--------------|--------------|-------------|-------|-------|
| 232.100      | Stop         | ID          |       |       |
|              | 113.000      | 35.00       | DP    | 36.00 |
|              | 36.00        | Cit         |       |       |

|              |              |             |       |       |
|--------------|--------------|-------------|-------|-------|
|              |              |             | CEP   | 14.00 |
|              | 14.00        |             | CE    | 25.00 |
|              | 25.00        |             |       |       |
| Q1 Mass (Da) | Q3 Mass (Da) | Dwell(msec) | Param | Start |
| 234.100      | 115.000      | 35.00       | DP    | 36.00 |
|              | 36.00        | Cit_istd    | CEP   | 14.00 |
|              | 14.00        |             | CE    | 25.00 |
|              | 25.00        |             |       |       |
| Q1 Mass (Da) | Q3 Mass (Da) | Dwell(msec) | Param | Start |
| 260.200      | 158.000      | 35.00       | DP    | 36.00 |
|              | 36.00        | Glu         | CEP   | 12.00 |
|              | 12.00        |             | CE    | 26.00 |
|              | 26.00        |             |       |       |
| Q1 Mass (Da) | Q3 Mass (Da) | Dwell(msec) | Param | Start |
| 265.200      | 163.100      | 35.00       | DP    | 36.00 |
|              | 36.00        | Glu_std     | CEP   | 12.00 |
|              | 12.00        |             | CE    | 26.00 |
|              | 26.00        |             |       |       |
| Q1 Mass (Da) | Q3 Mass (Da) | Dwell(msec) | Param | Start |
| 132.100      | 76.100       | 35.00       | DP    | 26.00 |
|              | 26.00        | Gly         | CEP   | 12.00 |
|              | 12.00        |             | CE    | 14.00 |
|              | 14.00        |             |       |       |

| Q1 Mass (Da) | Q3 Mass (Da) | Dwell(msec) | Param | Start |
|--------------|--------------|-------------|-------|-------|
| 135.100      | 79.100       | 35.00       | DP    | 26.00 |
|              | 26.00        | Gly std     | CEP   | 12.00 |
|              | 12.00        |             | CE    | 14.00 |
|              | 14.00        |             |       |       |

| Q1 Mass (Da) | Q3 Mass (Da) | Dwell(msec) | Param | Start |
|--------------|--------------|-------------|-------|-------|
| 206.200      | 104.100      | 35.00       | DP    | 28.00 |
|              | 28.00        | Met         | CEP   | 12.00 |
|              | 12.00        |             | CE    | 26.00 |
|              | 26.00        |             |       |       |

| Q1 Mass (Da) | Q3 Mass (Da) | Dwell(msec) | Param | Start |
|--------------|--------------|-------------|-------|-------|
| 209.200      | 107.100      | 35.00       | DP    | 28.00 |
|              | 28.00        | Met STD     | CEP   | 12.00 |
|              | 12.00        |             | CE    | 26.00 |
|              | 26.00        |             |       |       |

| Q1 Mass (Da) | Q3 Mass (Da) | Dwell(msec) | Param | Start |
|--------------|--------------|-------------|-------|-------|
| 189.200      | 70.100       | 35.00       | DP    | 31.00 |
|              | 31.00        | Orn         | CEP   | 12.00 |
|              | 12.00        |             | CE    | 31.00 |
|              | 31.00        |             |       |       |

| Q1 Mass (Da) | Q3 Mass (Da) | Dwell(msec) | Param | Start |
|--------------|--------------|-------------|-------|-------|
|              | Stop         | ID          |       |       |

|         |        |         |     |       |
|---------|--------|---------|-----|-------|
| 195.200 | 76.100 | 35.00   | DP  | 31.00 |
|         | 31.00  | Orn STD | CEP | 12.00 |
|         | 12.00  |         | CE  | 31.00 |
|         | 31.00  |         |     |       |

| Q1 Mass (Da) | Q3 Mass (Da) | Dwell(msec) | Param | Start |
|--------------|--------------|-------------|-------|-------|
| 222.200      | 119.900      | 35.00       | DP    | 28.00 |
|              | 28.00        | Phe         | CEP   | 12.00 |
|              | 12.00        |             | CE    | 26.00 |
|              | 26.00        |             |       |       |

| Q1 Mass (Da) | Q3 Mass (Da) | Dwell(msec) | Param | Start |
|--------------|--------------|-------------|-------|-------|
| 227.200      | 125.100      | 35.00       | DP    | 28.00 |
|              | 28.00        | Phe STD     | CEP   | 12.00 |
|              | 12.00        |             | CE    | 26.00 |
|              | 26.00        |             |       |       |

| Q1 Mass (Da) | Q3 Mass (Da) | Dwell(msec) | Param | Start |
|--------------|--------------|-------------|-------|-------|
| 238.200      | 136.100      | 35.00       | DP    | 28.00 |
|              | 28.00        | Tyr         | CEP   | 12.00 |
|              | 12.00        |             | CE    | 26.00 |
|              | 26.00        |             |       |       |

| Q1 Mass (Da) | Q3 Mass (Da) | Dwell(msec) | Param | Start |
|--------------|--------------|-------------|-------|-------|
| 242.200      | 140.100      | 35.00       | DP    | 28.00 |
|              | 28.00        | Tyr STD     | CEP   | 12.00 |
|              | 12.00        |             |       |       |

|              |              |             |       |       |
|--------------|--------------|-------------|-------|-------|
|              | 26.00        |             | CE    | 26.00 |
| Q1 Mass (Da) | Q3 Mass (Da) | Dwell(msec) | Param | Start |
| 174.200      | 72.100       | 35.00       | DP    | 28.00 |
|              | 28.00        | Val         | CEP   | 12.00 |
|              | 12.00        |             | CE    | 26.00 |
|              | 26.00        |             |       |       |
| Q1 Mass (Da) | Q3 Mass (Da) | Dwell(msec) | Param | Start |
| 182.200      | 80.100       | 35.00       | DP    | 28.00 |
|              | 28.00        | Val STD     | CEP   | 12.00 |
|              | 12.00        |             | CE    | 26.00 |
|              | 26.00        |             |       |       |
| Q1 Mass (Da) | Q3 Mass (Da) | Dwell(msec) | Param | Start |
| 188.200      | 86.000       | 35.00       | DP    | 28.00 |
|              | 28.00        | ile         | CEP   | 12.00 |
|              | 12.00        |             | CE    | 26.00 |
|              | 26.00        |             |       |       |
| Q1 Mass (Da) | Q3 Mass (Da) | Dwell(msec) | Param | Start |
| 191.200      | 89.000       | 35.00       | DP    | 28.00 |
|              | 28.00        | ile STD     | CEP   | 12.00 |
|              | 12.00        |             | CE    | 26.00 |
|              | 26.00        |             |       |       |

| Q1 Mass (Da) | Q3 Mass (Da) | Dwell(msec) | Param | Start |
|--------------|--------------|-------------|-------|-------|
| 394.300      | 85.000       | 35.00       | DP    | 44.00 |
|              | 44.00        | C5DC STD    | CEP   | 12.00 |
|              | 12.00        |             | CE    | 38.00 |
|              | 38.00        |             |       |       |

| Q1 Mass (Da) | Q3 Mass (Da) | Dwell(msec) | Param | Start |
|--------------|--------------|-------------|-------|-------|
| 316.300      | 85.000       | 35.00       | DP    | 44.00 |
|              | 44.00        | C6          | CEP   | 12.00 |
|              | 12.00        |             | CE    | 38.00 |
|              | 38.00        |             |       |       |

| Q1 Mass (Da) | Q3 Mass (Da) | Dwell(msec) | Param | Start |
|--------------|--------------|-------------|-------|-------|
| 319.300      | 85.000       | 35.00       | DP    | 44.00 |
|              | 44.00        | C6 STD      | CEP   | 12.00 |
|              | 12.00        |             | CE    | 38.00 |
|              | 38.00        |             |       |       |

| Q1 Mass (Da) | Q3 Mass (Da) | Dwell(msec) | Param | Start |
|--------------|--------------|-------------|-------|-------|
| 372.400      | 85.000       | 35.00       | DP    | 48.00 |
|              | 48.00        | C10         | CEP   | 12.00 |
|              | 12.00        |             | CE    | 38.00 |
|              | 38.00        |             |       |       |

| Q1 Mass (Da) | Q3 Mass (Da) | Dwell(msec) | Param | Start |
|--------------|--------------|-------------|-------|-------|
| 375.400      | 85.000       | 35.00       | DP    | 48.00 |
|              | 48.00        | C10 STD     |       |       |

|              |              |             |       |       |
|--------------|--------------|-------------|-------|-------|
|              |              |             | CEP   | 12.00 |
|              | 12.00        |             | CE    | 38.00 |
|              | 38.00        |             |       |       |
| Q1 Mass (Da) | Q3 Mass (Da) | Dwell(msec) | Param | Start |
| 400.400      | 85.000       | 35.00       | DP    | 52.00 |
|              | 52.00        | C12         | CEP   | 12.00 |
|              | 12.00        |             | CE    | 38.00 |
|              | 38.00        |             |       |       |
| Q1 Mass (Da) | Q3 Mass (Da) | Dwell(msec) | Param | Start |
| 403.400      | 85.000       | 35.00       | DP    | 52.00 |
|              | 52.00        | C12 STD     | CEP   | 12.00 |
|              | 12.00        |             | CE    | 38.00 |
|              | 38.00        |             |       |       |
| Q1 Mass (Da) | Q3 Mass (Da) | Dwell(msec) | Param | Start |
| 484.400      | 85.000       | 35.00       | DP    | 60.00 |
|              | 60.00        | C18         | CEP   | 12.00 |
|              | 12.00        |             | CE    | 43.00 |
|              | 43.00        |             |       |       |
| Q1 Mass (Da) | Q3 Mass (Da) | Dwell(msec) | Param | Start |
| 487.400      | 85.000       | 35.00       | DP    | 60.00 |
|              | 60.00        | C18 STD     | CEP   | 12.00 |
|              | 12.00        |             | CE    | 43.00 |
|              | 43.00        |             |       |       |

| Q1 Mass (Da) | Q3 Mass (Da) | Dwell(msec) | Param | Start |
|--------------|--------------|-------------|-------|-------|
| 318.400      | Stop         | ID          |       |       |
|              | 85.000       | 35.00       | DP    | 44.00 |
|              | 44.00        | C5OH        | CEP   | 12.00 |
|              | 12.00        |             | CE    | 38.00 |
|              | 38.00        |             |       |       |

| Q1 Mass (Da) | Q3 Mass (Da) | Dwell(msec) | Param | Start |
|--------------|--------------|-------------|-------|-------|
| 300.300      | Stop         | ID          |       |       |
|              | 85.000       | 35.00       | DP    | 44.00 |
|              | 44.00        | C5:1        | CEP   | 12.00 |
|              | 12.00        |             | CE    | 38.00 |
|              | 38.00        |             |       |       |

| Q1 Mass (Da) | Q3 Mass (Da) | Dwell(msec) | Param | Start |
|--------------|--------------|-------------|-------|-------|
| 374.300      | Stop         | ID          |       |       |
|              | 85.000       | 35.00       | DP    | 44.00 |
|              | 44.00        | C4DC        | CEP   | 12.00 |
|              | 12.00        |             | CE    | 38.00 |
|              | 38.00        |             |       |       |

| Q1 Mass (Da) | Q3 Mass (Da) | Dwell(msec) | Param | Start |
|--------------|--------------|-------------|-------|-------|
| 482.400      | Stop         | ID          |       |       |
|              | 85.000       | 35.00       | DP    | 60.00 |
|              | 60.00        | C18:1       | CEP   | 51.37 |
|              | 51.37        |             | CE    | 38.00 |
|              | 38.00        |             |       |       |

| Q1 Mass (Da) | Q3 Mass (Da) | Dwell(msec) | Param | Start |
|--------------|--------------|-------------|-------|-------|
|              | Stop         | ID          |       |       |

|         |        |       |     |       |
|---------|--------|-------|-----|-------|
| 426.400 | 85.000 | 35.00 | DP  | 56.00 |
|         | 56.00  | C14:1 |     |       |
|         | 12.00  |       | CEP | 12.00 |
|         | 38.00  |       | CE  | 38.00 |

| Q1 Mass (Da) | Q3 Mass (Da) | Dwell(msec) | Param | Start |
|--------------|--------------|-------------|-------|-------|
| 360.300      | 85.000       | 35.00       | DP    | 44.00 |
|              | 44.00        | C3DC        |       |       |
|              | 12.00        |             | CEP   | 12.00 |
|              | 38.00        |             | CE    | 38.00 |

| Q1 Mass (Da) | Q3 Mass (Da) | Dwell(msec) | Param | Start |
|--------------|--------------|-------------|-------|-------|
| 304.300      | 85.000       | 35.00       | DP    | 44.00 |
|              | 44.00        | C4OH        |       |       |
|              | 12.00        |             | CEP   | 12.00 |
|              | 38.00        |             | CE    | 38.00 |

| Q1 Mass (Da) | Q3 Mass (Da) | Dwell(msec) | Param | Start |
|--------------|--------------|-------------|-------|-------|
| 342.300      | 85.000       | 35.00       | DP    | 44.00 |
|              | 44.00        | C8:1        |       |       |
|              | 12.00        |             | CEP   | 12.00 |
|              | 38.00        |             | CE    | 38.00 |

| Q1 Mass (Da) | Q3 Mass (Da) | Dwell(msec) | Param | Start |
|--------------|--------------|-------------|-------|-------|
| 370.400      | 85.000       | 35.00       | DP    | 48.00 |
|              | 48.00        | C10:1       |       |       |
|              | 12.00        |             | CEP   | 12.00 |

|              |              |             |       |       |
|--------------|--------------|-------------|-------|-------|
|              |              |             | CE    | 38.00 |
|              | 38.00        |             |       |       |
| Q1 Mass (Da) | Q3 Mass (Da) | Dwell(msec) | Param | Start |
| 424.400      | 85.000       | 35.00       | DP    | 56.00 |
|              | 56.00        | C14:2       | CEP   | 12.00 |
|              | 12.00        |             | CE    | 38.00 |
|              | 38.00        |             |       |       |
| Q1 Mass (Da) | Q3 Mass (Da) | Dwell(msec) | Param | Start |
| 444.400      | 85.000       | 35.00       | DP    | 60.00 |
|              | 60.00        | C14OH       | CEP   | 12.00 |
|              | 12.00        |             | CE    | 38.00 |
|              | 38.00        |             |       |       |
| Q1 Mass (Da) | Q3 Mass (Da) | Dwell(msec) | Param | Start |
| 454.400      | 85.000       | 35.00       | DP    | 60.00 |
|              | 60.00        | C16:1       | CEP   | 12.00 |
|              | 12.00        |             | CE    | 38.00 |
|              | 38.00        |             |       |       |
| Q1 Mass (Da) | Q3 Mass (Da) | Dwell(msec) | Param | Start |
| 470.400      | 85.000       | 35.00       | DP    | 60.00 |
|              | 60.00        | C16:1OH     | CEP   | 12.00 |
|              | 12.00        |             | CE    | 38.00 |
|              | 38.00        |             |       |       |

| Q1 Mass (Da) | Q3 Mass (Da) | Dwell(msec) | Param | Start |
|--------------|--------------|-------------|-------|-------|
| 498.400      | 85.000       | 35.00       | DP    | 60.00 |
|              | 60.00        | C18:1OH     | CEP   | 12.00 |
|              | 12.00        |             | CE    | 38.00 |
|              | 38.00        |             |       |       |

| Q1 Mass (Da) | Q3 Mass (Da) | Dwell(msec) | Param | Start |
|--------------|--------------|-------------|-------|-------|
| 496.400      | 85.000       | 35.00       | DP    | 60.00 |
|              | 60.00        | C18:2OH     | CEP   | 12.00 |
|              | 12.00        |             | CE    | 38.00 |
|              | 38.00        |             |       |       |

| Q1 Mass (Da) | Q3 Mass (Da) | Dwell(msec) | Param | Start |
|--------------|--------------|-------------|-------|-------|
| 500.400      | 85.000       | 35.00       | DP    | 60.00 |
|              | 60.00        | C18OH       | CEP   | 12.00 |
|              | 12.00        |             | CE    | 38.00 |
|              | 38.00        |             |       |       |

| Q1 Mass (Da) | Q3 Mass (Da) | Dwell(msec) | Param | Start |
|--------------|--------------|-------------|-------|-------|
| 172.000      | 116.000      | 35.00       | DP    | 24.00 |
|              | 24.00        | Pro         | CEP   | 12.00 |
|              | 12.00        |             | CE    | 13.00 |
|              | 13.00        |             |       |       |

| Q1 Mass (Da) | Q3 Mass (Da) | Dwell(msec) | Param | Start |
|--------------|--------------|-------------|-------|-------|
| 179.000      | 123.000      | 35.00       | DP    | 24.00 |
|              | 24.00        | Pro STD     |       |       |

|              |              |             |       |       |
|--------------|--------------|-------------|-------|-------|
|              |              |             | CEP   | 12.00 |
|              | 12.00        |             | CE    | 13.00 |
|              | 13.00        |             |       |       |
| Q1 Mass (Da) | Q3 Mass (Da) | Dwell(msec) | Param | Start |
|              | Stop         | ID          |       |       |
| 461.600      | 85.000       | 35.00       | DP    | 60.00 |
|              | 60.00        | Unknown     | CEP   | 50.32 |
|              | 50.32        |             | CE    | 38.00 |
|              | 38.00        |             |       |       |

### Parameter Table(Period 1 Experiment 1)

|      |         |
|------|---------|
| CUR: | 20.00   |
| CAD: | Medium  |
| IS:  | 5000.00 |
| TEM: | 300.00  |
| GS1: | 30.00   |
| GS2: | 30.00   |
| ihe: | ON      |
| EP   | 10.00   |
| CXP  | 4.00    |

### Resolution tables

Quad 1 Positive Unit  
 Last Modification Date Time: March 23, 2017 13:59:06

|           |              |
|-----------|--------------|
| IE1       | 0.800        |
| Mass (Da) | Offset Value |
| 59.050    | 0.050        |
| 175.133   | 0.122        |
| 616.464   | 0.365        |
| 906.673   | 0.525        |
| 1254.925  | 0.679        |
| 1545.134  | 0.811        |

Quad 3 Positive Unit  
 Last Modification Date Time: April 19, 2018 16:27:42

|           |              |
|-----------|--------------|
| IE3       | 2.800        |
| Mass (Da) | Offset Value |
| 59.050    | 0.033        |

|          |       |
|----------|-------|
| 175.133  | 0.085 |
| 616.464  | 0.170 |
| 906.673  | 0.293 |
| 1254.925 | 0.345 |
| 1545.134 | 0.305 |

### Calibration tables

Quad 1                      Positive                      Unit Resolution  
 Last Modification Date Time: April 19, 2018 16:30:07

| Mass (Da) | Dac Value |
|-----------|-----------|
| 59.050    | 1848      |
| 175.133   | 5549      |
| 616.464   | 19629     |
| 906.673   | 28893     |
| 1254.925  | 39996     |
| 1545.134  | 49249     |

Quad 3                      Positive                      Unit Resolution  
 Last Modification Date Time: April 19, 2018 16:30:50

| Mass (Da) | Dac Value |
|-----------|-----------|
| 59.050    | 1848      |
| 175.133   | 5561      |
| 616.464   | 19682     |
| 906.673   | 28979     |
| 1254.925  | 40100     |
| 1545.134  | 49380     |

### Instrument Parameters:

Detector Parameters (Positive):  
 CEM                      2450.0

### Keyed Text:

File was created with the software version: Analyst 1.6.2

**Supplementary Table S1** Metabolites and stable isotope-labeled internal standards, MRM transitions for derivatives

| Precursor ion | Product ion | AA/IS            | Product       |     |         | Compound Name                     |
|---------------|-------------|------------------|---------------|-----|---------|-----------------------------------|
|               |             |                  | Precursor ion | ion | AC/IS   |                                   |
| 146,1         | 44          | Alanine          | 260,2         | 85  | C2      | Acetyl-L-carnitine                |
| 150,1         | 48          | Alanine-D4       | 263,2         | 85  | C2-D3   |                                   |
| 231,1         | 70,1        | Arginine         | 274,2         | 85  | C3      | Propionyl-L-carnitine             |
| 238,1         | 77,1        | Arginine-D7      | 360,3         | 85  | C3DC    | Malonyl-L-carnitine               |
| 246,2         | 144,1       | Aspartic acid    | 277,2         | 85  | C3-D3   |                                   |
|               |             | Aspartic acid-D7 |               |     |         |                                   |
| 249,2         | 147,1       |                  | 288,2         | 85  | C4      | Butyryl-L-carnitine               |
| 232,1         | 113         | Cit              | 374,3         | 85  | C4DC    | Succinyl-L-carnitine              |
| 234,1         | 115         | Cit-D2           | 304,3         | 85  | C4OH    | Hydroxybutyryl-L-carnitine        |
| 260,2         | 158         | Glu              | 291,2         | 85  | C4-D3   |                                   |
| 265,2         | 163,1       | Glu-D5           | 302,2         | 85  | C5      | Valeryl-L-carnitine               |
| 132,1         | 76,1        | Gly              | 318,4         | 85  | C5OH    | Hydroxyvaleryl-L-carnitine        |
| 135,1         | 79,1        | Gly-13C2-15N1    | 300,3         | 85  | C5:1    | Tiglyl-L-carnitine                |
| 206,2         | 104,1       | Met              | 311,2         | 85  | C5-D9   |                                   |
| 209,2         | 107,1       | Met-D3           | 388,3         | 85  | C5_DC   | Glutaryl-L-carnitine              |
| 189,2         | 70,1        | Orn              | 394,3         | 85  | C5DC-D6 |                                   |
| 195,2         | 76,1        | Orn-D6           | 316,3         | 85  | C6      | Hexanoyl-L-carnitine              |
| 222,2         | 119,9       | Phe              | 319,3         | 85  | C6-D3   |                                   |
| 227,2         | 125,1       | Phe-D5           | 344,3         | 85  | C8      | Octanoyl-L-carnitine              |
| 238,2         | 136,1       | Tyr              | 342,3         | 85  | C8:1    | Octenoyl-L-carnitine              |
| 242,2         | 140,1       | Tyr-D4           | 347,3         | 85  | C8-D3   |                                   |
| 174,2         | 72,1        | Val              | 372,4         | 85  | C10     | Decanoyl-L-carnitine              |
| 182,2         | 80,1        | Val-D8           | 370,4         | 85  | C10:1   | Decenoyl-L-carnitine              |
| 188,2         | 86          | xle              | 375,4         | 85  | C10-D3  |                                   |
| 191,2         | 89          | Leu-D3           | 400,4         | 85  | C12     | Dodecanoyl-L-carnitine            |
| 172           | 116         | Pro              | 403,4         | 85  | C12-D3  |                                   |
| 179           | 123         | Pro-D7           | 428,4         | 85  | C14     | Tetradecanoyl-L-carnitine         |
| 218,2         | 85          | C:0              | 426,4         | 85  | C14:1   | Tetradecenoyl-L-carnitine         |
| 227,2         | 85          | C:0-D9           | 424,4         | 85  | C14:2   | Tetradecadienyl-L-carnitine       |
|               |             |                  |               |     |         | Hydroxytetradecanoyl-L-carnitine  |
|               |             |                  | 444,4         | 85  | C14OH   |                                   |
|               |             |                  | 431,4         | 85  | C14-D3  |                                   |
|               |             |                  | 456,4         | 85  | C16     | Hexadecanoyl-L-carnitine          |
|               |             |                  |               |     |         | Hydroxyhexadecanoyl-L-carnitine   |
|               |             |                  | 472,4         | 85  | C16OH   |                                   |
|               |             |                  | 454,4         | 85  | C16:1   | Hexadecenoyl-L-carnitine          |
|               |             |                  |               |     |         | Hydroxyhexadecenoyl-L-carnitine   |
|               |             |                  | 470,4         | 85  | C16:1OH |                                   |
|               |             |                  | 459,4         | 85  | C16-D3  |                                   |
|               |             |                  | 484,4         | 85  | C18     | Octadecanoyl-L-carnitine          |
|               |             |                  | 482,4         | 85  | C18:1   | Octadecenoyl-L-carnitine          |
|               |             |                  |               |     |         | Hydroxyoctadecenoyl-L-carnitine   |
|               |             |                  | 498,4         | 85  | C18:1OH |                                   |
|               |             |                  |               |     |         | Hydroxyoctadecadienyl-L-carnitine |
|               |             |                  | 496,4         | 85  | C18:2OH |                                   |
|               |             |                  |               |     |         | Hydroxyoctadecanoyl-L-carnitine   |
|               |             |                  | 500,4         | 85  | C18OH   |                                   |
|               |             |                  | 487,4         | 85  | C18-D3  |                                   |
